# Supplementary material for: Three silver iodides with zero and one-dimensional hybrid structures directed by conjugated organic templates: synthesis and theoretical study
Source: Royal Society of Chemistry journal article supplement (doi:10.1039/b902465d), 2009-01-01
Supplement: b902465d.pdf [file b902465d.pdf]

### Calculation details:

Electronic structure calculation was based on density function theory (DFT),<sup>1</sup> in which wave functions were explained in a plane wave basis set and the spin polarized version of the PW-91 GGA was employed for the exchange-correlation functional in the CASTEP code.<sup>2</sup>

1 J. P. Perdew, K. Burke, M. Ernzerhof, *Phy. Rev. Lett.* 1996, **77**, 3865.

2 M. Segall, P. Lindan, M. Probert, C. Pickard et al, Materials Studio CASTEP version 4.1,2006.

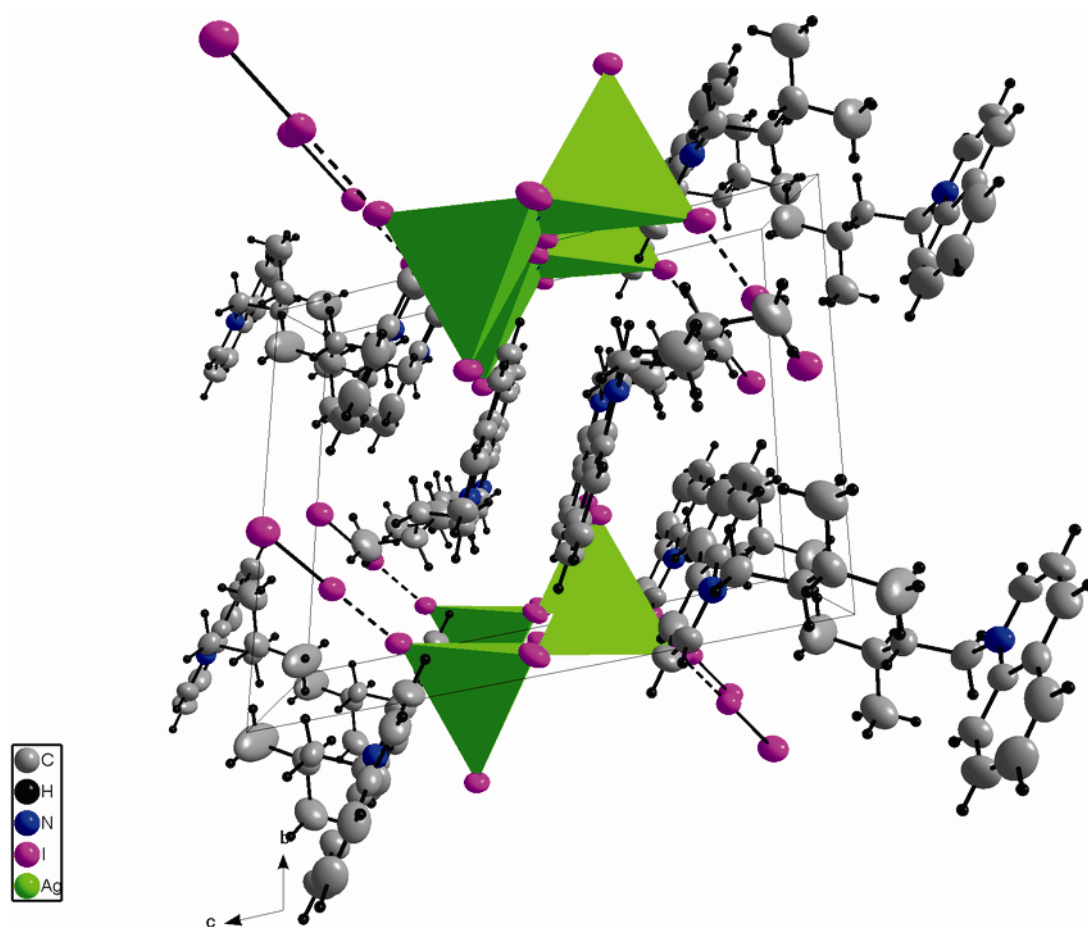

**Fig. S1** Packing diagram of **1**

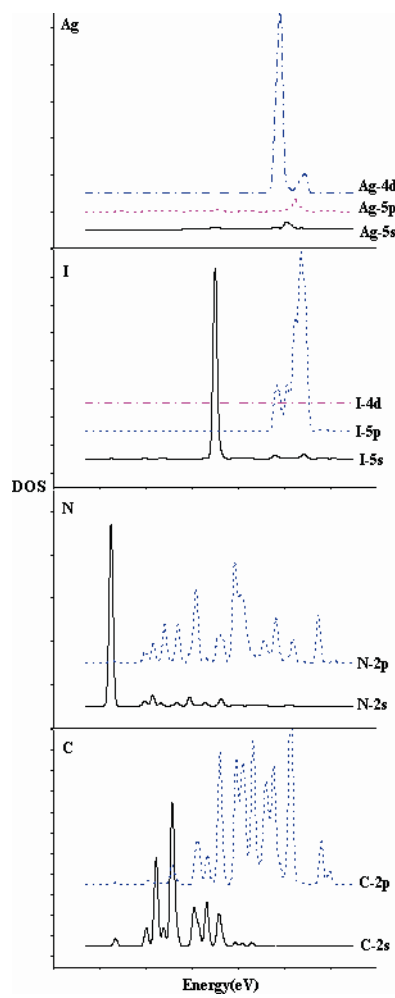

**Fig. S2** PDOS of compound 1

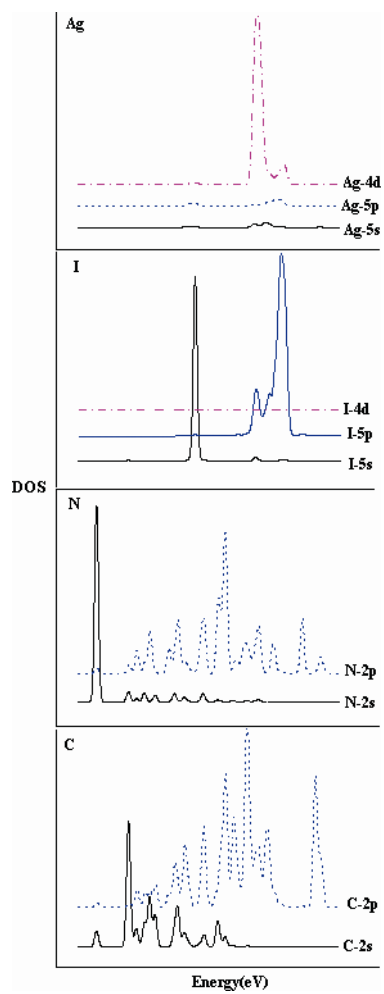

Fig. S3 PDOS of compound 2
